# Supplementary material
Source: PubMed Central journal article supplement (PMC9669304)
Supplement: NIHMS1832841-supplement-Main_Supplementary_Information.pdf [file NIHMS1832841-supplement-Main_Supplementary_Information.pdf]

**Supplementary information**

---

**Mapping and targeted viral activation of pancreatic nerves in mice reveal their roles in the regulation of glucose metabolism**

---

In the format provided by the authors and unedited

## **CONTENTS**

### **Supplementary Methods**

**Supplementary Fig. 1** | AAVs do not elicit apoptosis in transduced neurons.

**Supplementary Fig. 2** | Assessment of colocalization of pancreas and liver-projecting neurons in the CG.

**Supplementary Fig. 3** | Assessment of AAV8-hSyn-DIO-hM3D(Gq)-mCherry expression in ChAT-IRES-CRE mice in ganglia, gut, liver, spleen and CNS.

**Supplementary Fig. 4** | Assessment of AAV8-hSyn-DIO-hM3D(Gq)-mCherry expression in ChAT-IRES-CRE mice in pancreatic islets and with neural markers in intrapancreatic ganglia.

**Supplementary Fig. 5** | Activation of pancreas-projecting neurons expressing chemogenetic constructs by CNO.

### **Supplementary Tables 1–3**

### **Captions for Supplementary Videos 1–3**

## Supplementary Methods

### Surgical Procedures: Dual Pancreas and Liver injection

Intrapancreatic injections were performed as described previously,  $1 \times 10^{11}$  (Dose 1) viral genomes of AAV8-hSyn-mCherry were injected in WT mice. Three weeks later, 10  $\mu$ l of Cholera Toxin B (CT $\beta$ ) at concentration 8  $\mu$ g/ $\mu$ L were injected in 1  $\mu$ L increments into all lobes of the liver. After 1 week, animals were sacrificed as described previously. CG were fixed, prepared for cryosection and stained for CT $\beta$  and mCherry as described above. The quantification of mCherry+ and CT $\beta$ + neurons overlap was done using the JaCOP plugin by FIJI.

### Tissue Processing: Cryosections

Heart, kidneys, brain and muscles were immersed in 30% sucrose (Sigma-Aldrich, 50389) in PBS overnight, then embedding in O.C.T Compound (ThermoFisher Scientific; 23-730-572), frozen at -80C, and sectioned at 10  $\mu$ m thickness. Tissues were stained overnight for mCherry (Abcam; ab205402) + synapsin1 (Cell Signaling; 5297S) at 1:1000 dilution. GFP (AVES, Tigard, OR; GFP-1020), at 1:1000 dilution) Subsequent secondary antibodies used were Alexa Fluor 546 anti-rabbit (ThermoFisher Scientific; A10040), Alexa Fluor 647 anti-chicken (Jackson ImmunoResearch; 703-605-155) and Alexa Fluor 647 anti-chicken (Jackson ImmunoResearch; 703-605-155, Lot#138591). Tissues were stained for DAPI and coverslipped as stated previously. Samples were visualized using a fluorescent Zeiss Axio Observer Z.1 microscope.

### Ex vivo Calcium Imaging

AAV-hSyn-hM3D(Gq)-mCherry was administered to Snap25-2A-GCaMP6s-D via intraductal infusion ( $5 \times 10^{11}$  (Dose 2)). Four weeks post-injection animals were anesthetized, as described above and CG dissected and placed in glass bottom 35  $\mu$ m dish (Ibidi, # 81158) and incubated in HEPES-buffered solution (125 mM NaCl, 5.9 mM KCl, 2.56 mM CaCl<sub>2</sub>, 1 mM MgCl<sub>2</sub>, 25 mM HEPES, 0.1% BSA [wt/vol.], 3mM D-glucose pH 7.4) at 37°C and 5% CO<sub>2</sub>, for 30 min. Imaging was performed using a Zeiss LSM 880 confocal microscope with a 10X (NA: 0.3). Briefly, Z-stacks of the whole CG was acquired at a temporal resolution of 10 s. CNO (20  $\mu$ M) was administered after 20 s and KCl stimulation (50mM) at 10 min was performed to confirm neuronal responsiveness. Image analysis was performed using FIJI. Briefly regions of interests (ROI) were selected for background, mCherry+ neurons and mCherry- neurons, and mean intensity was calculated for every ROI in each image. Calcium responses were quantified as fluorescence intensity normalized to baseline fluorescence.

## Supplementary Figures

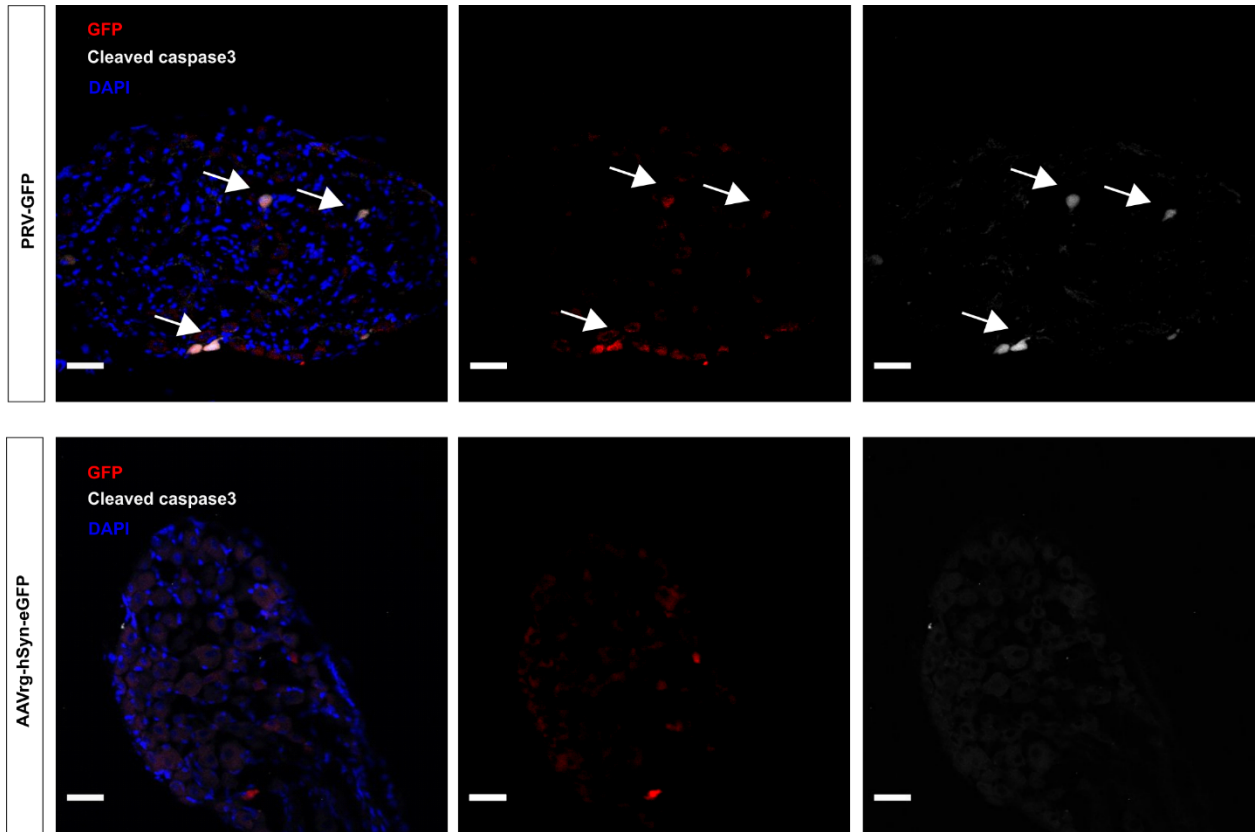

### Supplementary Fig. 1 | AAVs do not elicit apoptosis in transduced neurons.

Representative immunofluorescence images of cleaved caspase-3 (white), GFP (red) and DAPI (blue) in NG sections, from mice 3 days after intrapancreatic injection of PRV-GFP ( $2 \times 10^6$  vg) and 4 weeks after intrapancreatic injection of rAAV2retro-hSyn-GFP ( $1 \times 10^{11}$  vg). One study, 2 samples per group. Scale bars: 50  $\mu$ m.

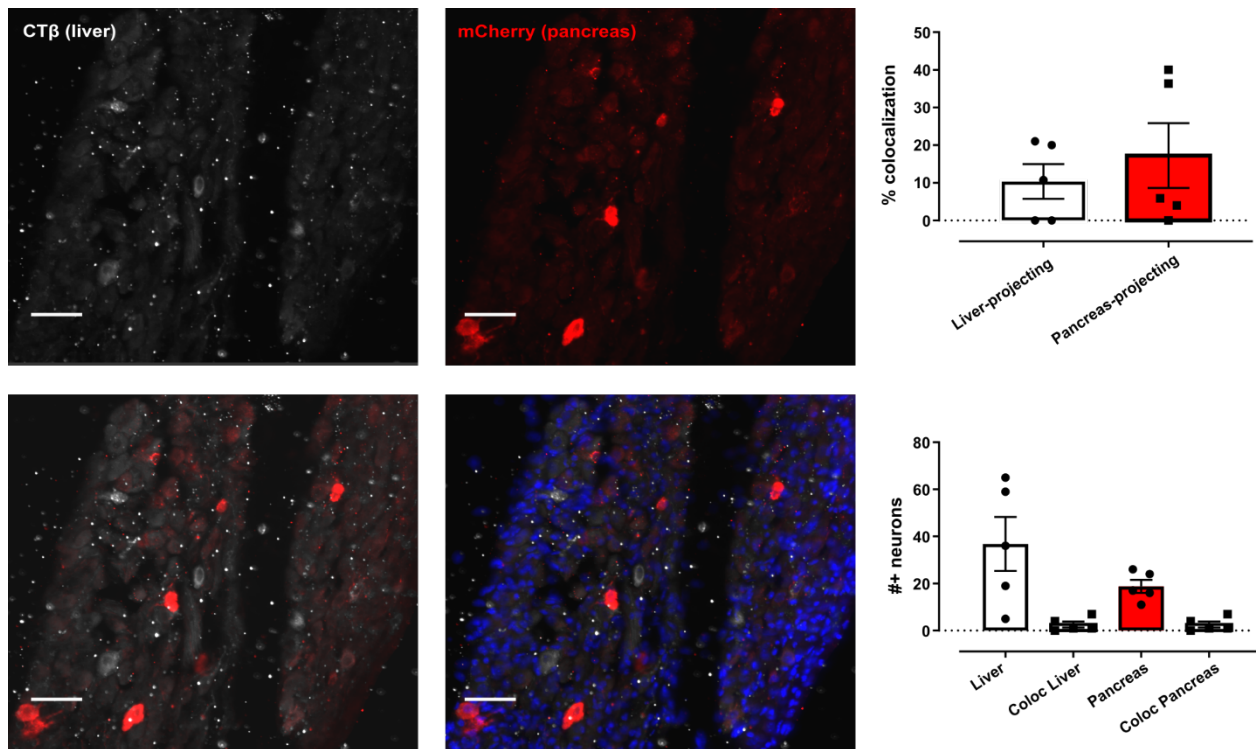

**Supplementary Fig. 2 | Assessment of colocalization of pancreas and liver-projecting neurons in the CG.** Representative immunofluorescence images of CG from mice that received AAV8-hSyn-mCherry via intrapancreatic injection (mCherry+ pancreas-projecting neurons in red) and CTβ via liver injection (CTβ+ liver-projecting neurons in white) N= 5 mice/group. Scale bars: 50 μm. Right upper panel, quantification of percentage of pancreas-projecting neurons that colocalize with liver-projecting neurons and percentage of liver-projecting neurons that colocalize with pancreas-projecting neurons. Bottom right panel, number of pancreas-projecting neurons, pancreas-projecting neurons that colocalize with liver-projecting neurons, liver-projecting neurons and liver-projecting neurons that colocalize with pancreas-projecting neurons. Data are shown as mean ± SEM.

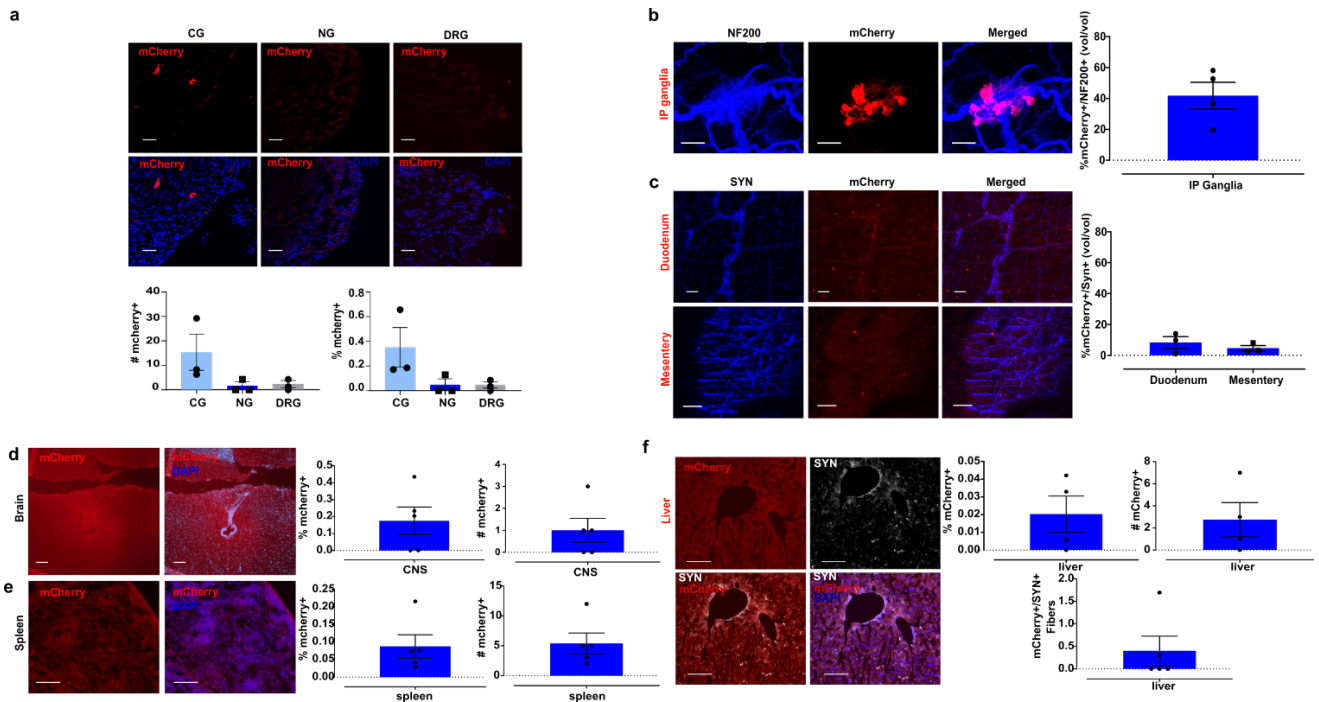

**Supplementary Fig. 3 | Assessment of AAV8-hSyn-DIO-hM3D(Gq)-mCherry expression in ChAT-IRES-CRE mice in ganglia, gut, liver, spleen and CNS.** **a)** Representative immunofluorescence images of CG, NG and DRG after intraductal infusion of AAV8-hSyn-DIO-hM3D(Gq)-mCherry ( $5 \times 10^{11}$  vg) in ChAT-IRES-cre mice showing mCherry (red) and DAPI (blue). Scale bars:  $50 \mu\text{m}$ . Lower panels: quantification of total mCherry+ cells (left) and as a percentage of DAPI+ cells (right).  $N = 3$  mice/group. **b)** Maximum projection confocal images of iDISCO+ cleared pancreas demonstrating expression of mCherry+ pancreas-innervating neurons (red) within IP ganglia stained for NF200 (blue) Scale bars:  $50 \mu\text{m}$ . Right panel: Quantification of mCherry+ expression as percentage of NF200+ intrapancreatic ganglia volume.  $N = 4$  mice. **c)** mCherry+ expression (red) in duodenal and mesenteric innervation stained for Synapsin (blue) Scale bars:  $50 \mu\text{m}$ . Right panel: quantification of mCherry+ expression as percentage of total Synapsin+ volume.  $N = 3$  mice. **d)** Representative images of mCherry (red) and DAPI (blue) in hindbrain, showing minimal viral expression of AAV8-hSyn-DIO-hM3D(Gq)-mCherry in ChAT-IRES-cre mice. Scale bars:  $100 \mu\text{m}$ . Right panel: quantification of mCherry+ cells as a percentage of DAPI+ cells (left) and as total number (right).  $N = 5$  mice. **e)** Representative images of mCherry (red) and DAPI (blue) in spleen, showing minimal viral expression of AAV8-hSyn-DIO-hM3D(Gq)-mCherry in ChAT-IRES-cre mice. Scale bars:  $100 \mu\text{m}$ . Right panel: quantification of expression of the mCherry+ cells as a percentage of DAPI+ cells (left) and as total number (right).  $N = 5$  mice. **f)** Representative images of mCherry (red), synapsin (white) and DAPI (blue) in liver, showing minimal viral expression in liver cells ( $N = 4$  mice) and minimal overlap with synapsin+ fibers of AAV8-hSyn-DIO-hM3D(Gq)-mCherry in ChAT-IRES-cre mice ( $N = 5$  mice). Scale bars:  $100 \mu\text{m}$ . Right upper panel: quantification of expression of mCherry+ cells as a percentage of DAPI+ cells (left) and as total number (right). Lower right panel: quantification of overlap of mCherry+ and synapsin+ fibers. Data are shown as mean  $\pm$  SEM.

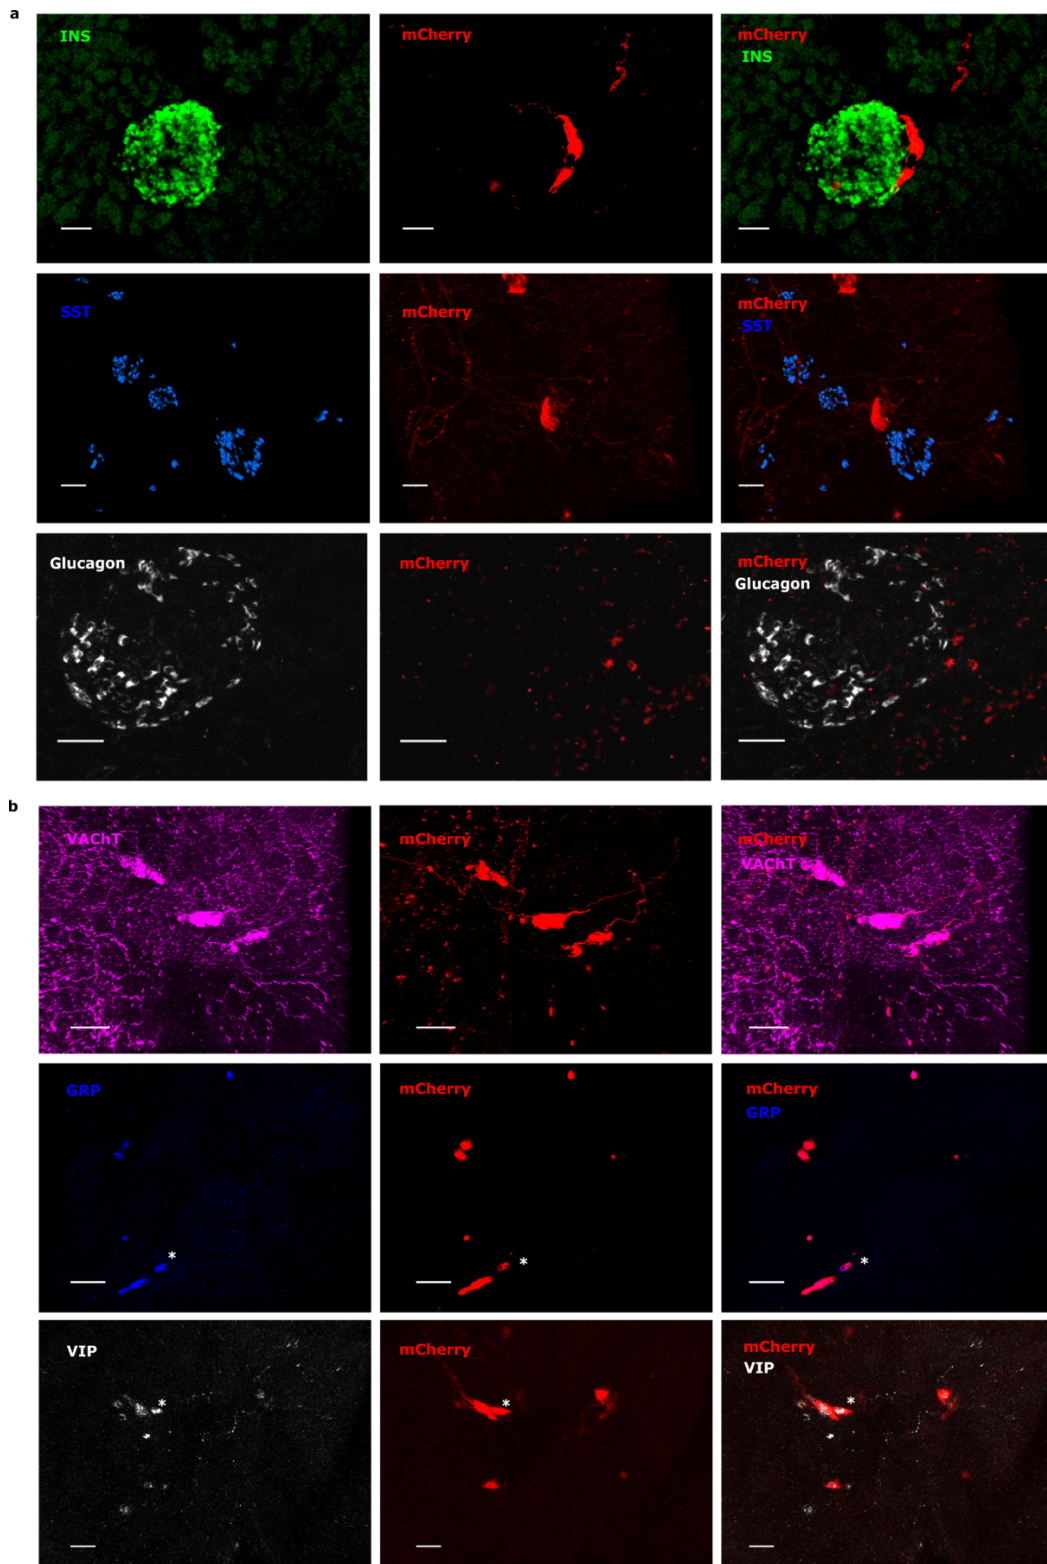

**Supplementary Fig. 4 | Assessment of AAV8-hSyn-DIO-hM3D(Gq)-mCherry expression in ChAT-IRES-CRE mice in pancreatic islets and with neural markers in intrapancreatic ganglia. a)** Representative confocal images of iDISCO+ cleared pancreas from ChAT-IRES-cre/AAV8-hSyn-DIO-hM3D(Gq)-mCherry mice stained for insulin (INS, green), somatostatin (SST, blue), glucagon (white) showing no overlap with viral expression (mCherry, red). One study, 2 samples per group. Scale bars: 50  $\mu$ m. **b)** Representative confocal images of iDISCO+ cleared pancreas, stained for parasympathetic markers VAcHT (magenta), Gastrin Release Peptide (GRP, blue) and Vasoactive Intestinal Peptide (VIP, white), showing co-expression with mCherry+ (red) neurons. Co-localization of neural markers with mCherry is indicated by asterisks. One study, 2 samples per group. Scale bars: 50  $\mu$ m.

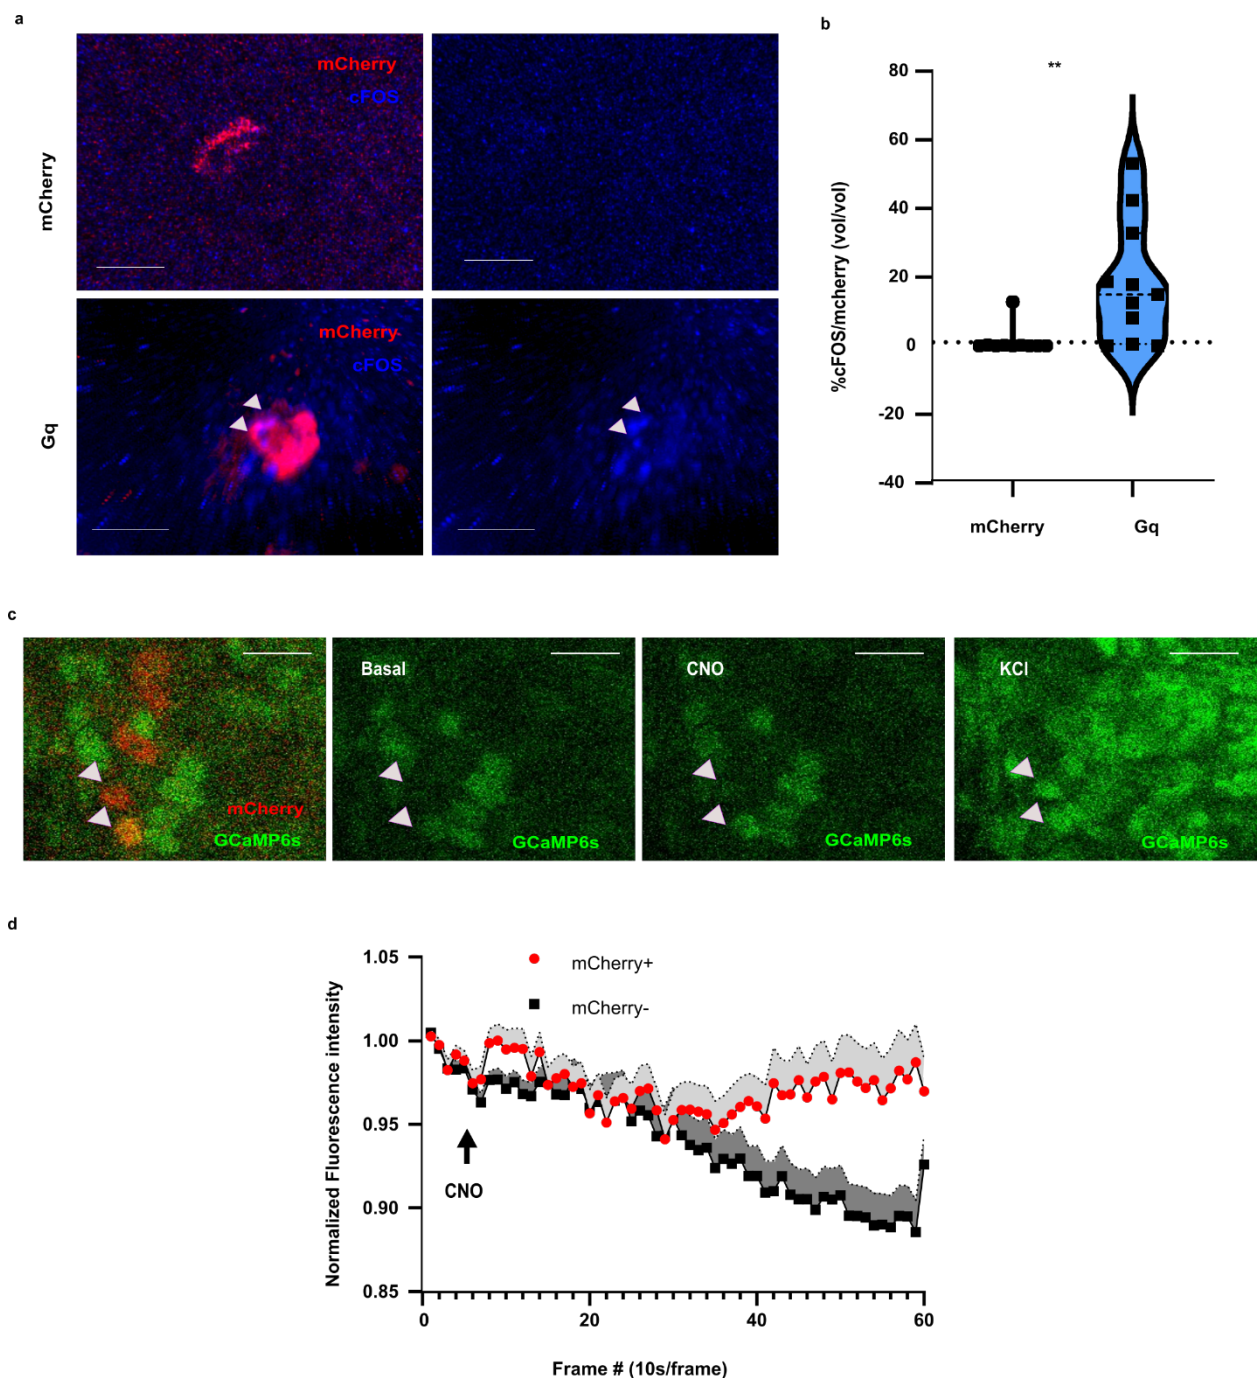

**Supplementary Fig. 5 | Activation of pancreas-projecting neurons expressing chemogenetic constructs by CNO. a)** Representative confocal images of mCherry+ (red) intrapancreatic ganglia and cFOS (blue) in pancreas of CNO-treated ChAT-IRES-cre/AAV8-hSyn-DIO-mCherry mice (upper panel) and CNO-treated ChAT-IRES-cre/AAV8-hSyn-DIO-hM3D(Gq)-mCherry mice (lower panel). Scale bar: 50  $\mu$ m. **b)** Quantification of cFOS+ expression in mCherry+ intrapancreatic ganglia of CNO-treated ChAT-IRES-cre/AAV8-hSyn-DIO-hM3D(Gq)-mCherry (11 ganglia from 3 mice) and CNO-treated ChAT-IRES-cre/AAV8-hSyn-DIO-mCherry mice (control) (10 ganglia from 3 mice). cFOS volume expressed as percentage of mCherry+ volume of the ganglia. Two-tailed Mann-Whitney test, \*\* $p=0.005$ . **c)** Representative images of mCherry+ pancreas-projecting neurons in the CG from Snap25-2A-GCaMP6S mice, 4 weeks after intrapancreatic injection of AAV8-hSyn-hM3D(Gq)-mCherry, showing mCherry expression, basal fluorescence, response to CNO (20  $\mu$ M) and KCl (50 mM). 3 independent replicates Scale bar Scale bar: 50  $\mu$ m. **d)** Normalized Fluorescence Intensity ( $F/F_0$ ) of mCherry+ neurons and mCherry- neurons in CG after CNO treatment (N=3 mice)



## Supplementary Tables

**Supplementary Table 1** | Quantification of total number of neurons per ganglia. Data are shown as mean  $\pm$  SEM.

| Ganglia  | # Neurons                   |
|----------|-----------------------------|
| CG       | 1470.857 $\pm$ 556.654 (7)  |
| L-NG     | 13332 $\pm$ 394.475 (9)     |
| R-NG     | 994.8 $\pm$ 208.252 (8)     |
| L-DRG10  | 1171.5 $\pm$ 187.044 (10)   |
| L-DRG13  | 1269.286 $\pm$ 235.551 (10) |
| R-DRG10  | 1133.714 $\pm$ 231.999 (10) |
| R-DRG13  | 1365.143 $\pm$ 224.428 (9)  |
| All NGs  | 1000.529 $\pm$ 319.882(17)  |
| All DRGs | 1042.769 $\pm$ 217.256 (39) |

**Supplementary Table 2** | Statistical details for Figs. 1–7.

| Figure number and title                                                                                        | Statistical Details                                                                                                                                                                                                                                                                                                                                                                                                                                                                                                                                                                                                                                                                                                                                                                                                                                                                                                                                                                                                                            |
|----------------------------------------------------------------------------------------------------------------|------------------------------------------------------------------------------------------------------------------------------------------------------------------------------------------------------------------------------------------------------------------------------------------------------------------------------------------------------------------------------------------------------------------------------------------------------------------------------------------------------------------------------------------------------------------------------------------------------------------------------------------------------------------------------------------------------------------------------------------------------------------------------------------------------------------------------------------------------------------------------------------------------------------------------------------------------------------------------------------------------------------------------------------------|
| <b>Fig. 1   Pancreas is innervated by neurons in coeliac, nodose, dorsal root and intrapancreatic ganglia.</b> | One-way ANOVA was used for statistical analyses with multiple comparisons corrected by Tukey post-hoc test. <b>e</b> : left panel, $p = 0.6335$ , $F = 0.725$ ; right panel, $p = 0.841$ , $F = 0.4445$ ). $p$ represents statistical significance and $F$ represents the F-statistic. Data are shown as mean $\pm$ SEM.                                                                                                                                                                                                                                                                                                                                                                                                                                                                                                                                                                                                                                                                                                                       |
| <b>Fig. 2   AAV serotypes selectively target pancreatic autonomic efferent and afferent nerves.</b>            | Panel <b>c</b> left: Kruskal-Wallis test between serotypes in CG, NG and DRG, $p = 0.001$ , $0.002$ and $0.003$ ; $\chi^2_{(3)} = 15.57$ , $14.96$ and $14.17$ respectively. Multiple comparisons corrected by Dunn's multiple comparison test: CG: AAV9 vs AAV6 $p=0.0033$ , AAV9 vs AAV6 $p=0.024$ , AAV8 vs AAVrg $p=0.031$ . NG: AAV9 vs AAV8 $p=0.005$ , AAV8 vs AAVrg $p=0.008$ . DRG: AAV9 vs AAV8 $p=0.013$ , AAV8 vs AAVrg $p=0.002$ .<br>Panel <b>c</b> , right: Kruskal-Wallis test between serotypes in CG, NG and DRG, $p = 0.001$ , $0.004$ and $0.001$ , $\chi^2_{(3)} = 17.04$ , $13.29$ and $15.66$ respectively. Multiple comparisons corrected by Dunn's multiple comparison test: CG: AAV8 vs AAV6 $**p=0.006$ AAV8 vs AAVrg $*p=0.012$ . NG: AAV9 vs AAV8 $*p=0.01$ , AAV8 vs AAVrg $*p=0.013$ . DRG: AAV9 vs AAVrg $*p=0.021$ , AAV8 vs AAVrg $*p=0.049$ , AAV6 vs AAVrg $**p=0.009$ .<br>Panel <b>d</b> : One-way ANOVA $p = 0.468$ , $F = 0.903$ corrected using Tukey posthoc test. Data are shown as mean $\pm$ SEM. |
| <b>Fig. 3   Optimization of gene delivery</b>                                                                  | Statistical analyses between IP and ID delivery used two-tailed Mann-Whitney U test in:<br>Panel <b>b</b> . For CG, L-NG, R-NG, L-DRG10, L-DRG13, R-DRG10, R-DRG13; $P=0.057$ , $0.486$ , $0.487$ , $0.309$ , $0.885$ , $0.904$ , $0.334$ respectively.<br>Kruskal-Wallis test with Dunn's multiple comparison test was used for dose response analyses.<br>Panel <b>d</b> : $p = 0.057$ $\chi^2_{(3)} = 10.86$ ,<br>Panel <b>f</b> : $p = 0.137$ , $\chi^2_{(3)} = 6.98$ , upper left, $p = 0.117$ , $\chi^2_{(3)} = 7.39$ upper right; $p = 0.616$ , $\chi^2_{(3)} = 2.66$ lower left, $p = 0.628$ , $\chi^2_{(3)} = 2.60$ lower right). Data are shown as mean $\pm$ SEM.                                                                                                                                                                                                                                                                                                                                                                   |

|                                                                                                   |                                                                                                                                                                                                                                                                                                                                                                                                                                                                                                                                                                                                                                                                                                                                                                                                                                                                                                                                                                                                                                                                                                                                                                                                                                                                                                                                                            |
|---------------------------------------------------------------------------------------------------|------------------------------------------------------------------------------------------------------------------------------------------------------------------------------------------------------------------------------------------------------------------------------------------------------------------------------------------------------------------------------------------------------------------------------------------------------------------------------------------------------------------------------------------------------------------------------------------------------------------------------------------------------------------------------------------------------------------------------------------------------------------------------------------------------------------------------------------------------------------------------------------------------------------------------------------------------------------------------------------------------------------------------------------------------------------------------------------------------------------------------------------------------------------------------------------------------------------------------------------------------------------------------------------------------------------------------------------------------------|
| <p><b>Fig.4 I Combined strategy for restricted gene expression in pancreatic innervation.</b></p> | <p>Kruskal-Wallis test was used for statistical analyses:<br/> <b>c:</b> left, n = 3 replicates/group, ***p&lt;0.0001, <math>\chi^2_{(3)} = 248.5</math> using Dunn's multiple comparison test; right panel, n = 3 replicates/group ***p&lt;0.0001, <math>\chi^2_{(3)} = 50.62</math> using Dunn's multiple comparison test).<br/> Two-tailed Mann-Whitney test was used for statistical analysis of mCherry+ cells in liver<br/> <b>g:</b> *p=0.029 (left), <b>h:</b> p=0.690 and <b>i:</b> p=0.184.<br/> Two-tailed unpaired t-test was used for mCherry+ cells in CG, p=0.5739 (<b>g</b>, right).<br/> Data are shown as mean <math>\pm</math> SEM. Each <i>in vitro</i> study was performed 3 times with 3 technical replicates on each occasion.</p>                                                                                                                                                                                                                                                                                                                                                                                                                                                                                                                                                                                                  |
| <p><b>Fig. 5 I Pancreas parasympathetic activation improves glucose control.</b></p>              | <p>Two-way ANOVA with Sidak's multiple comparisons test for panel <b>b:</b> p=0.007, F=2.825. **p=0.003(15'), **p=0.003(30'), **p=0.003(45'), *p=0.013(60'), **p=0.008(90'), **p=0.004(120'), panel <b>c:</b> p=0.134, F=1.631<br/> panel <b>d:</b> p&lt;0.0001, F=15.09. *p=0.018(0'), ***p=0.0004(15'), ****p=0.0001(30'), ****p=0.0001(45'), ***p=0.0005(60'), ***p=0.0004(90'), *p=0.0432(120')<br/> panel <b>e</b>, left: p&lt;0.0001, F=5.701. mCherry vs Gq: *p=0.0163(15'), **p=0.0072(30'), *p=0.0157(45'), *p=0.0168(90'), mCherry-Atropine vs Gq: *p=0.0175(15'), **p=0.0010(30'), **p=0.0027(45'), **p=0.0052(60'), *p=0.0208(90')<br/> panel <b>f:</b> p=0.216, F=1.417 and panel <b>g:</b> p=0.006, F=5.60. *p=0.045(0'), *p=0.013(15').<br/> Mixed-Effect analysis with Sidak's multiple comparisons for:<br/> panel <b>h:</b> p=0.671, F=0.639. *p=0.028(15'). Panel <b>i:</b> p=0.419. Krustal-Wallis test for panel <b>e</b>, right; p=0.03, <math>\chi^2_{(2)} = 13.64</math> with Dunn's multiple comparisons test. mCherry vs Gq **p=0.0026, mCherry-Atropine vs Gq *p=0.0253.<br/> Two-tailed Mann-Whitney test for AUC for panel <b>b</b>, right: ***p&lt;0.0001, panel <b>c</b>, right: p=0.0653.<br/> Two-tailed unpaired t-test for panel <b>d</b>, right: ***p&lt;0.0001.<br/> Data are shown as mean <math>\pm</math> SEM.</p> |
| <p><b>Fig. 6 I Effects of ablation of parasympathetic pancreatic innervation.</b></p>             | <p>Two-tailed Mann-Whitney test was used for statistical analyses in panel <b>b:</b> *p=0.016 and panel <b>c:</b> left, p= 0.904, center, p=0.167, right, p= 0.142.<br/> Two-way ANOVA was used for statistical analyses in panel <b>d:</b> p=0.753, F=0.568. panel <b>g:</b> p=0.917, F=0.330. panel <b>h:</b> p=0.241, F= 1.389. All analyses were corrected by Sidak's multiple comparisons test.<br/> Two-tailed Paired t-test was used for statistical analysis in panel <b>e:</b> left p= 0.112, right *p= 0.032.<br/> Mixed-Effect analysis was used for statistical analysis corrected by Sidak's multiple comparisons for panel <b>i:</b> p=0.917, F=0.166.<br/> Data are shown as mean <math>\pm</math> SEM.</p>                                                                                                                                                                                                                                                                                                                                                                                                                                                                                                                                                                                                                                 |
| <p><b>Fig. 7 I Pancreas sympathetic activation impairs glucose homeostasis</b></p>                | <p>Two-way ANOVA with Sidak's multiple comparison test was used for statistical analyses in panel <b>c:</b> p=0.023, F=2.418. panel <b>d:</b> p=0.040, F=2.18, *p=0.013 (30') and *p=0.030 (45'), panel <b>e:</b> , p=0.684, F=0.688. panel <b>f:</b> p=0.475, F=0.944.<br/> Mixed-Effect analysis with Sidak's multiple comparison test was used for panel <b>g:</b> p=0.391, F=1.021 and <b>h:</b> p= 0.506, F= 0.713.<br/> Two-tailed unpaired t-test was used in panel <b>c</b>, right: p=0.629. panel <b>d</b>, right: *p=0.020, panel <b>e</b>, right: p=0.263 and panel <b>f</b>, right: p = 0.1833<br/> Data are shown as mean <math>\pm</math> SEM.</p>                                                                                                                                                                                                                                                                                                                                                                                                                                                                                                                                                                                                                                                                                           |

**Supplementary Table 3.** Statistical details for Extended Data Figs. 1–4.

| Figure number and title                                                                                                                     | Statistical Details                                                                                                                                                                                                                                                                                                                                                                                                                                                                                                                                                                                                                                                                                                                                                                                                                                                                                                                                                                                                                                                                                                                                                                 |
|---------------------------------------------------------------------------------------------------------------------------------------------|-------------------------------------------------------------------------------------------------------------------------------------------------------------------------------------------------------------------------------------------------------------------------------------------------------------------------------------------------------------------------------------------------------------------------------------------------------------------------------------------------------------------------------------------------------------------------------------------------------------------------------------------------------------------------------------------------------------------------------------------------------------------------------------------------------------------------------------------------------------------------------------------------------------------------------------------------------------------------------------------------------------------------------------------------------------------------------------------------------------------------------------------------------------------------------------|
| <p><b>Extended Data Fig. 1   Distribution of CTβ+ pancreas-innervating neurons across ganglia</b></p>                                       | <p>Two-tailed Mann-Whitney test, n = 3 mice, 402 CTβ+ pancreas-innervating neurons for CG, 304 CTβ+ pancreas-innervating neurons for L-NG, 251 CTβ+ pancreas-innervating neurons for R-NG, 264 CTβ+ pancreas-innervating neurons for L-DRG, 141 CTβ+ pancreas-innervating neurons for R-DRG: L-NG vs. R-NG, ****p&lt;0.0001, L-DRGs vs. R-DRGs, **p=0.001). Data are shown as mean ± SEM.</p>                                                                                                                                                                                                                                                                                                                                                                                                                                                                                                                                                                                                                                                                                                                                                                                       |
| <p><b>Extended Data Fig 2.   Off-target expression after intrapancreatic delivery of AAV</b></p>                                            | <p>Kruskal-Wallis test, corrected using Dunn's multiple comparison test. <b>b:</b> lower panel, p = 0.521, <math>\chi^2_{(3)} = 2.449</math>, <b>c:</b> lower panel, p = 0.475, <math>\chi^2_{(3)} = 2.744</math>, <b>d:</b> upper panel, p = 0.534, <math>\chi^2_{(3)} = 2.188</math>, lower panel, p= 0.511, <math>\chi^2_{(3)} = 2.310</math>, <b>e:</b> upper panel p = 0.002, <math>\chi^2_{(3)} = 14.45</math> *p=0.020 AAV9 vs AAVrg, *p=0.033 AAV8 vs AAVrg; lower panel p = 0.002, <math>\chi^2_{(3)} = 14.69</math>, <b>f:</b> upper panel p = 0.034, <math>\chi^2_{(3)} = 8.67</math>; *p=0.050 AAV8 vs AAV6, lower panel p = 0.085, <math>\chi^2_{(3)} = 6.67</math>. Data are shown as mean ± SEM.</p>                                                                                                                                                                                                                                                                                                                                                                                                                                                                 |
| <p><b>Extended Data Fig 3.   Neuronal specific promoters for gene delivery into pancreatic innervation.</b></p>                             | <p>One-way ANOVA corrected by Tukey's multiple comparison test used for panel <b>c</b>, left panel: HEK293T cells, p &lt; 0.0001, F = 108.1. JeT vs hSyn ****p&lt;0.0001, JeT vs NSE ****p&lt;0.0001, N2A cells, p &lt; 0.0001, F = 50.90. JeT vs hSyn ****p&lt;0.0001, JeT vs NSE ****p&lt;0.0001, hSyn vs NSE **p=0.009. Panel <b>c</b>, right: HEK293T cells, p &lt; 0.0001, F = 108.1. JeT vs hSyn ****p&lt;0.0001, JeT vs NSE ****p&lt;0.0001, N2A cells, p &lt; 0.0001, F = 38.86. JeT vs hSyn ****p&lt;0.0001, hSyn vs NSE **p=0.002. Panel <b>d</b>, right: HEK293T cells, p &lt; 0.0001, F = 95.12. JeT vs hSyn ****p&lt;0.0001, JeT vs NSE ****p&lt;0.0001, N2A cells, p &lt; 0.0001, F = 50.90. JeT vs hSyn ****p&lt;0.0001, JeT vs NSE ****p&lt;0.0001, hSyn vs NSE**p=0.002. Krustal-Wallis corrected by Dunn's multiple comparison test used for panel <b>d</b>, left: HEK293T cells, p = 0.0037, <math>\chi^2_{(2)} = 11.19</math>. JeTvs.hSyn **p=0.003, JeTvs.NSE *p=0.044, N2A cells, p = 0.021, <math>\chi^2_{(2)} = 7.776</math>. JeTvs.hSyn *p=0.019 Two-tailed Mann-Whitney test was used for panels <b>e</b> and <b>f</b>. Data are shown as mean ± SEM.</p> |
| <p><b>Extended Data Fig 4.   CNO does not affect GTT in wild-type (WT) mice and female ChAT-IRES-cre/AAV8-Syn-DIO-hM3D(Gq)-mCherry.</b></p> | <p>Two-way ANOVA corrected by Sidak's multiple comparisons tests <b>a:</b> p=0.811, F=0.530. <b>b:</b> p&lt;0.001, F=4.552. (*p=0.022(15'), *p=0.010(30'), *p=0.0145(45'), *p=0.0132(90') <b>c:</b> p=0.130, F =1.667. <b>d:</b> p=0.351, F=1.137. <b>e:</b> p=0.155, F=1.464. <b>f:</b> p=0.674, F=0.698. <b>g:</b> p=0.025, F= 2.483. <b>h:</b> p=0.015, F=52.729. <b>i:</b> p=0.993, F=0.122. Mixed-Effect analysis with Sidak's multiple comparisons <b>m:</b> p=0.018, F=4.977. <b>n:</b> p=0.994, F=1.050. <b>o:</b> p=0.677, F=0.868. Two-tailed Mann-Whitney test (right <b>b:</b> **p=0.001, right <b>d:</b> p=0.104). Two-tailed Unpaired t-test (right <b>a:</b> p=0.573. <b>c:</b> p=0.913. <b>j:</b> p=0.407. <b>k:</b> p=0.114. <b>l:</b> p=0.375. Data are shown as mean ± SEM</p>                                                                                                                                                                                                                                                                                                                                                                                   |

## Captions for the Supplementary Videos

**Supplementary Video 1** | Lightsheet microscopy images of mouse pancreatic samples cleared with iDISCO+ and immunostained for insulin (blue) and vesicular acetylcholine transporter (VACHT, white) demonstrating dense parasympathetic innervation and intrapancreatic ganglia.  
([https://drive.google.com/file/d/1I7DauzJ95DiU0xp6eLpHt-SHo\\_1fpa2J/view?usp=sharing](https://drive.google.com/file/d/1I7DauzJ95DiU0xp6eLpHt-SHo_1fpa2J/view?usp=sharing))

**Supplementary Video 2** | Lightsheet microscopy images of mouse pancreatic samples cleared with iDISCO+ and stained for insulin (blue) and tyrosine hydroxylase (TH, white) demonstrating dense catecholaminergic innervation of the pancreas.  
([https://drive.google.com/file/d/1KDvqx6sOnycew\\_FMH40SuqOBoateX491/view?usp=sharing](https://drive.google.com/file/d/1KDvqx6sOnycew_FMH40SuqOBoateX491/view?usp=sharing))

**Supplementary Video 3** | Confocal microscopy images of pancreas-innervating neurons in CG cleared with iDISCO+ demonstrating 3D distribution of pancreas-projecting neurons and the approach used for segmentation and assessment of neural volume using Imaris with neurons color-coded based on their volumes.
